# Supplementary material for: Henipavirus RNA in African Bats
Source: PubMed Central journal article supplement (PMC2712088; doi:10.1371/journal.pone.0006367), 2009-07-28
Supplement: pone.0006367.s001.pdf [file pone.0006367.s001.pdf]

10 20 30 40 50 60 70 80  
Hendra virus AF017149 GTACCGTGACAGGCATCGGGGAGCCTTGGCCTCCACTTTATCTGCCATCGCATGCATCGAAACACATAATAAGACTCAAGA  
Nipah virus AY988601 . . . TA . G . . T . . A . . CG . A . . G . . C . . . . . T . . C . . C . . CG . A . . . . . T . . G . . T . . . . . CC . CT . G . . A .  
Nipah virus AF212302 . . . TA . G . . T . . A . . CG . A . . . . . C . . . . . T . . . . . C . . CG . A . . . . . T . . . . . T . . . . . CC . TT . G . . A .  
BatPV/Eid.hel/GH10 FJ609191 T . . . . T . AA . . G . A . . G . T . . . . . T . . AACCT . T . . AA . . . . . T . CATC . GG . A . . C . A . . . . . AC . AT  
BatPV/Eid.hel/GH45 GQ168929 . . . TA . A . . T . . A . . G . . TA . . . . . A . . CTG . A . . . T . . TC . C . . TGT . . ACCTGC . . TCG . . A . AAAC . AC  
BatPV/Eid.hel/GH48 FJ609194 A . T . . G . . T . . A . . G . A . . T . TG . . . . . CT . TTG . . TC . . T . . TGAT . . . . . TCC . TTA . . C . A . TCCAAA . . . .

90 100 110 120 130 140 150 160  
Hendra virus AF017149 ATTCTGGTGAATCATTAAACAGTTGATGATTGTGTTAAGAAGTGGGAGTTCATTTTGTGGGATTCAATTTGATTGCTTTTATG  
Nipah virus AY988601 . . . . . G . . . . . T . . . . . CA . . . . . C . . . . . C . . . . . A . . . . . C . . . . . T . . . . . C . . . . .  
Nipah virus AF212302 . . . . . G . . . . . T . . . . . CA . . . . . C . . . . . C . . . . . T . . . . . A . . . . . C . . . . . T . . . . . C . . . . .  
BatPV/Eid.hel/GH10 FJ609191 CA . . A . . G . . AG . C . G . . TTA . . AATA . . A . . AC . . . . . A . A . . . . . C . . C . GA . T . . A . A . . T . . . . .  
BatPV/Eid.hel/GH45 GQ168929 TAAA . CA . . . . . G . GT . . A . A . . G . C . . A . C . . . . . T . . C . A . . . . . AT . CAGT . . CA . G . . T . . . . .  
BatPV/Eid.hel/GH48 FJ609194 TGAAC . . A . . GG . . . . . G . . . . . A . A . . G . . . . . C . CAG . . . . . T . . . . . A . . . . . G . . . . . AT . . A . C . . . . . C . . . . .

170 180 190 200 210 220 230 240  
Hendra virus AF017149 GAGTTAAAATTAGACAGTGATTTGAGCATGTATATGAAAGATAAAGCACTATCCCCAATAAAGGAGGAATGGGATAGTGT  
Nipah virus AY988601 . . . C . G . . . . . . . . . . T . . . . . . . . . . CT . G . . T . . T . . C . A . . C . G . . . . . C . . . . .  
Nipah virus AF212302 . . . C . G . . . . . G . . . . . C . . . . . T . . . . . TT . . . . . T . . . . . C . A . . C . . . . . C . . . . .  
BatPV/Eid.hel/GH10 FJ609191 . . TC . T . . T . . G . . TGAA . C . . . . . G . . . . . T . . TG . TG . G . . G . A . T . . G . . . . . C . . . . .  
BatPV/Eid.hel/GH45 GQ168929 CCA . . TC . . . . . TTCA . . C . T . . T . . . . . C . . . . . G . C . . . . . T . . . . . A . T . AT . ATCA . . . . . CTC . . . . .  
BatPV/Eid.hel/GH48 FJ609194 CCC . . G . C . C . . . . . TGA . . CC . . . . . T . . . . . C . . . . . G . . . . . TT . . . . . G . . . . . TCGATCAC . . . . . TCA . . . . .

250 260 270 280 290 300 310 320  
Hendra virus AF017149 CTATCCACGTGAAGTACTTAATTACACGCCACCCAGATCTACCGAACCAAGAAGATTGGTGGATGTATTTGTCAATGATG  
Nipah virus AY988601 A . . C . . . . . A . . . . . G . G . GC . T . C . . . . . G . A . . A . . G . . . . . T . C . T . . . . . A . . C . . . . .  
Nipah virus AF212302 A . . C . . . . . GT . G . GC . T . C . . . . . G . AG . . A . . G . . . . . T . C . T . . . . . A . . C . . . . .  
BatPV/Eid.hel/GH10 FJ609191 T . . . . TAAG . . AAT . CTC . . . . . CA . . . . . A . A . A . AA . . AACCT . T . G . G . A . . . . . TAC . . A . . . . .  
BatPV/Eid.hel/GH45 GQ168929 . . . . . CGCAAC . AACACC . A . . . . . A . . . . . T . . . . . CAAAC . T . T . G . . . . . A . T . . AGG . CA . TG . A . . . . .  
BatPV/Eid.hel/GH48 FJ609194 A . . C . . TACATCCAATA . G . CC . . . . . AT . . T . . T . TT . G . . ATC . T . T . . . . . A . T . . . . . CA . . . . .

330 340 350 360 370 380 390 400  
Hendra virus AF017149 AGAATTTTCGATCCTTATAATATGTTAGAGTATGTCTTACAGGAGATTATTTAACTGATGAACAATTCAATGTTTCTTAT  
Nipah virus AY988601 . A . . C . . T . . . . . G . C . C . . C . . . . . A . . . . . T . GT . C . C . C . . C . CGAA . . . . . T . . . . . C . . . . .  
Nipah virus AF212302 . A . . C . . T . . . . . A . . C . C . C . G . A . . . . . T . AT . C . T . C . . . . . C . CGAG . . . . . . . . . . .  
BatPV/Eid.hel/GH10 FJ609191 . AG . . . . . TAAG . . AAT . CTC . . . . . CA . . . . . A . A . A . AA . . AACCT . T . G . G . A . . . . . TAC . . A . . . . .  
BatPV/Eid.hel/GH45 GQ168929 . TG . G . . T . . A . . A . C . G . C . . A . CA . T . . . . . T . . . . . T . G . . . . . C . C . G . . . . . TAC . . T . . A . C . A . . C . . . . .  
BatPV/Eid.hel/GH48 FJ609194 CTG . C . . T . . A . . . . . CG . . AT . AA . T . . T . . . . . A . C . GC . . . . . A . . C . . GA . . CA . G . . . . . A . C . C . . . . .

410 420 430  
Hendra virus AF017149 AGTCTAAAGGAGAAAGAACTAAACAAGCAGGAAGATTA  
Nipah virus AY988601 . . . T . G . . . . . . . . . . G . A . . G . G . T . . C . . . . . G . . . . .  
Nipah virus AF212302 . . CT . G . . . . . . . . . . G . G . G . . T . . C . . . . . G . . . . .  
BatPV/Eid.hel/GH10 FJ609191 . . . . . A . . . . . G . A . GG . . T . . . . . C . C . . . . .  
BatPV/Eid.hel/GH45 GQ168929 . . . . . A . A . . . . . GTC . . G . . TC . . C . . . . .  
BatPV/Eid.hel/GH48 FJ609194 . . . . . C . A . A . . . . . GGTG . . G . G . TG . . TC . TC . T . . . . .
