# Supplementary material for: Henipavirus RNA in African Bats
Source: PubMed Central journal article supplement (PMC2712088; doi:10.1371/journal.pone.0006367), 2009-07-28
Supplement: pone.0006367.s002.pdf [file pone.0006367.s002.pdf]

|                                    |                                                                                                                                                                 |    |    |    |    |    |    |    |
|------------------------------------|-----------------------------------------------------------------------------------------------------------------------------------------------------------------|----|----|----|----|----|----|----|
|                                    | 10                                                                                                                                                              | 20 | 30 | 40 | 50 | 60 | 70 | 80 |
| <b>Hendra virus AF017149</b>       | Y R D R H R G A W P P L Y L P S H A S K H I I R L K N S G E S L T V D D C V K N W E S F C G I Q F D C F M E L K L D S D L S M Y M K D K A L S P I K E E W D S V |    |    |    |    |    |    |    |
| <b>Nipah virus AY988601</b>        | . . . . . G . . . . . A . . . . . I . . . . . D . . . . .                                                                                                       |    |    |    |    |    |    |    |
| <b>Nipah virus AF212302</b>        | . . . . . G . . . . . A . . . . . I . . . . . D . . . . .                                                                                                       |    |    |    |    |    |    |    |
| <b>BatPV/Eid.hel/GH10 FJ609191</b> | . . . K . G . V . . . . T F . K . V H Q E . K . . Q S . . . R . . Y E I . I . H . K . . . . L N . K . . . D . N . . E . . . . . A A . R N . . . . .             |    |    |    |    |    |    |    |
| <b>BatPV/Eid.hel/GH45 GQ168929</b> | . . . . . G . T . . . C N . . P . C . P A . R K K Q L N A . . V S I E . . I Q . . Q . . . F S . K . . . P . S . . . . . N . S . . . . .                         |    |    |    |    |    |    |    |
| <b>BatPV/Eid.hel/GH48 FJ609194</b> | F . . . . G . V . . S C F . . D . . . P L . K S K . M N . . A . . I E . . A E . . K . . . . F N . . . . . P . T . . D . . . . . R S Q . . . . .                 |    |    |    |    |    |    |    |

|                                    |                                                                                                                                     |     |     |     |     |     |
|------------------------------------|-------------------------------------------------------------------------------------------------------------------------------------|-----|-----|-----|-----|-----|
|                                    | 90                                                                                                                                  | 100 | 110 | 120 | 130 | 140 |
| <b>Hendra virus AF017149</b>       | Y P R E V L N Y T P P R S T E P R R L V D V F V N D E N F D P Y N M L E Y V L T G D Y L T D E Q F N V S Y S L K E K E T K Q A G R L |     |     |     |     |     |
| <b>Nipah virus AY988601</b>        | . . . . . S . . . . . K . . . . . S . A . . E . D . . . . .                                                                         |     |     |     |     |     |
| <b>Nipah virus AF212302</b>        | . . . . . S . . . . . K . . . . . S . A . . E . . . . .                                                                             |     |     |     |     |     |
| <b>BatPV/Eid.hel/GH10 FJ609191</b> | . . K . N . S . Q . T K N . T . . . . . Y . I . . . D . . . . S . . Q . . I N . . . . N . P D . . . . . E V . . . . .               |     |     |     |     |     |
| <b>BatPV/Eid.hel/GH45 GQ168929</b> | . . A T N T K . . . . . Q T S . . . . . R . I E . D E . E . S D . I N . . . S . E . . S . D T . . I . . . . . V . E V . . . . .     |     |     |     |     |     |
| <b>BatPV/Eid.hel/GH48 FJ609194</b> | . . T S N M T . N . . I . . S S . . . . . I . . A D . E . S K L I D . . I S . E . . D . K E . . I . . . . . V . E V . . . . .       |     |     |     |     |     |
